# Supplementary material
Source: PubMed Central journal article supplement (PMC3457109)
Supplement: AEM.01440-12_zam999103730so1.pdf [file AEM.01440-12_zam999103730so1.pdf]

**Influence of seasonal and geochemical changes on  
iron geomicrobiology of an iron-carbonate mineral water spring**

Florian Hegler<sup>1</sup>, Tina Lösekann-Behrens<sup>1</sup>, Kurt Hanselmann<sup>1,2,3</sup>, Sebastian Behrens<sup>1</sup>,  
and Andreas Kappler<sup>1\*</sup>

<sup>1</sup>Geomicrobiology, Center for Applied Geosciences, University of Tübingen, Germany

<sup>2</sup>University of Zurich, Institute of Plant Biology – Microbial Ecology, Zollikerstrasse 107, CH-8008 Zurich, Switzerland

<sup>3</sup>swiss i-research & training, Zurich, Switzerland

**Supplemental Material**

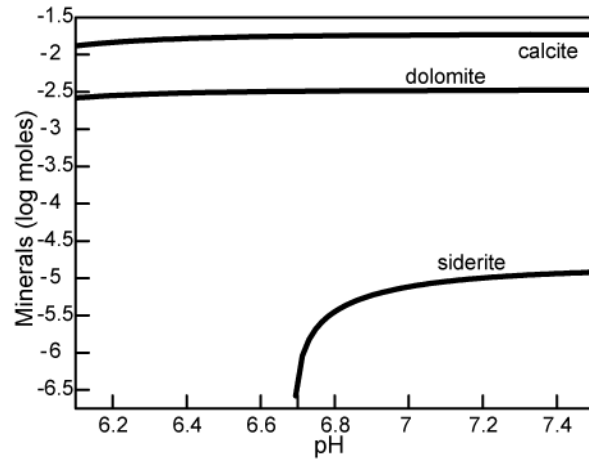

FIG S1. Thermodynamic modeling of carbonate mineral precipitation using the React-module of Geochemist's Workbench. The pH-change along the flow channel was used as variable on the x-axis. The y-axis shows the calculated amount of minerals precipitated under the given conditions. Temperature was kept constant at 5°C since temperature changes did not influence the thermodynamic modeling significantly. The ion concentrations measured at the spring were used in the matrix for the calculation.

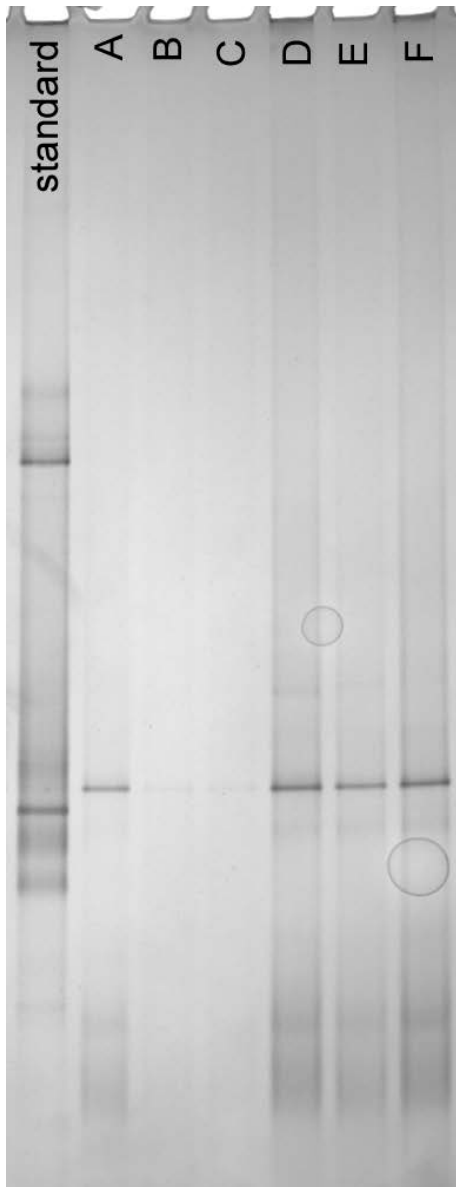

FIG S2. Representative DGGE-gel of the spring 2009 sampling campaign with cyanobacterial primers (TABLE S3). Lane A: flow channel, 0 m from spring outlet, lane B: flow channel, 1.2 m from spring outlet, lane C: flow channel, 2.2 m from spring outlet, lane D: microbial mat, 0 m from spring outlet, lane E: microbial mat, 1.2 m from spring outlet, lane F: microbial mat, 2.2 m from spring outlet.

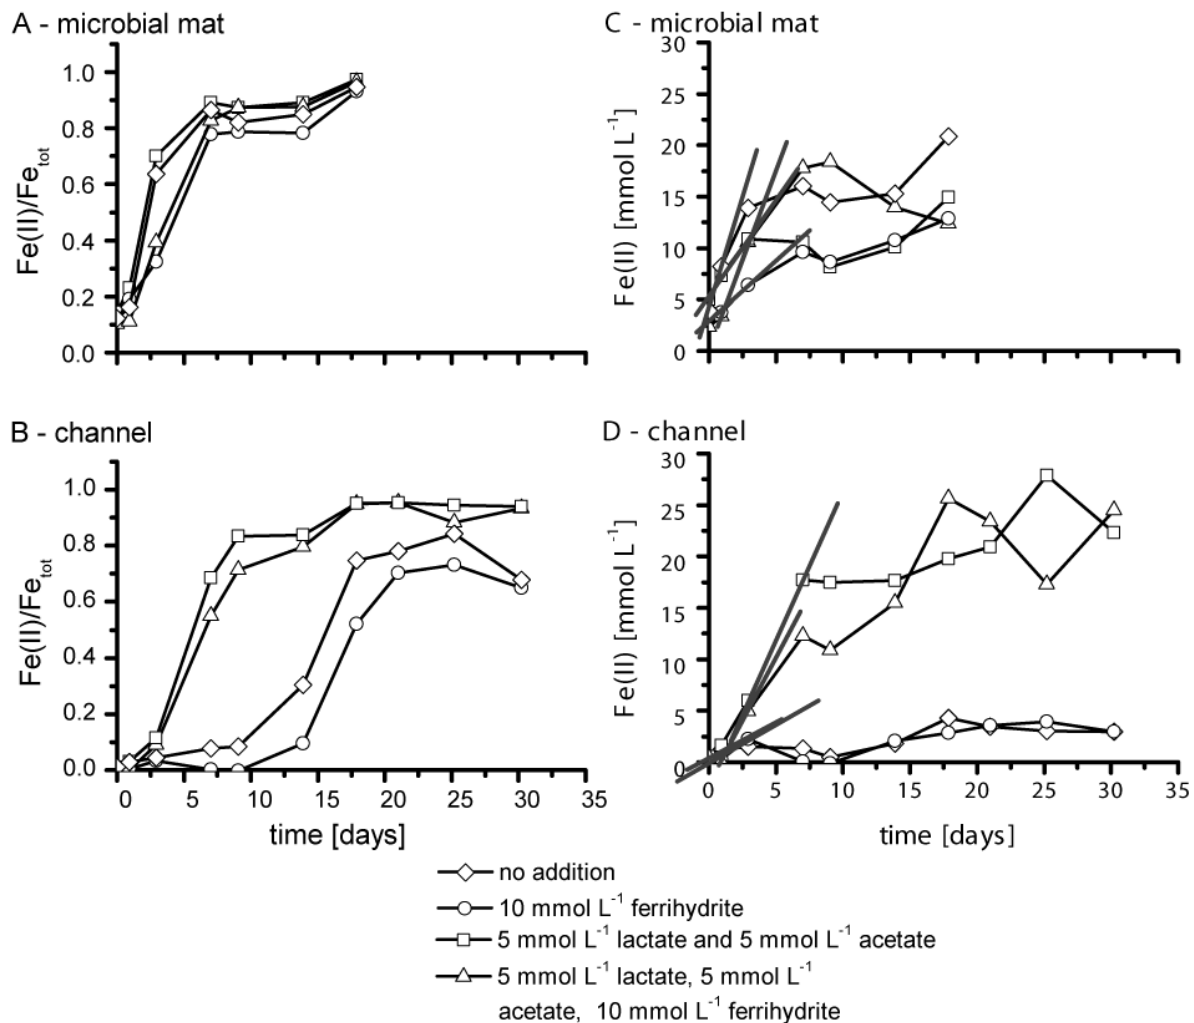

FIG S3. Reduction of Fe(III) in 1 g of wet sample collected from the Fuschna spring. A and C: sample collected from the side of the stream. B: sample collected from the middle of the channel. Samples were collected in summer 2010. A and B show Fe(II)/Fe<sub>tot</sub> while C and D show Fe(II)<sub>tot</sub>. This figure corresponds to Fig. 5 in the main manuscript but in addition it shows the regression lines used for the determination of the Fe(III) reduction rates for Fig. C and D.

TABLE S1. Calculation of expected Fe(II) concentrations considering chemical oxidation of Fe(II) in the flow channel in comparison to measured values. For the calculation the initial measured Fe<sup>2+</sup> concentration, the O<sub>2</sub> concentrations and pH at the different sampling points and the flow rate were used.

|                                                  | 0 m | 0.7 m | 1.2 m | 1.5 m | 2.2 m |
|--------------------------------------------------|-----|-------|-------|-------|-------|
| Fe(II) [ $\mu\text{mol/L}$ ] in water calculated | 15  | 4     | 1.5   | 0.6   | 0.2   |
| Fe(II) [ $\mu\text{mol/L}$ ] in water measured   | 15  | 13    | 13    | 15    | 13    |

TABLE S2. Modeling parameters for Mössbauer spectra collected at 77K from samples of August 2009 at three different locations from the Fuschna spring outlet. For the sample collected at 1.2 m an additional spectrum was collected at 5K.

|                          | outlet | 1.2 m<br>downstream | 2.3 m<br>downstream | ferrihydrate<br>reference ** |
|--------------------------|--------|---------------------|---------------------|------------------------------|
| $\delta_0$ (77K) *       | 0.47   | 0.48                | 0.47                | 0.46                         |
| $\Delta\epsilon$ (77K) * | 0.99   | 0.94                | 0.90                | 0.70                         |
| $\sigma_\Delta$ (77K) *  | 0.73   | 0.57                | 0.47                | NA                           |
| $\delta_0$ (5K) *        | ND     | 0.49                | ND                  | 0.48                         |
| $\epsilon$ (5K) *        | ND     | -0.05               | ND                  | -0.02                        |
| H (5K) *                 | ND     | 44.3                | ND                  | 45.3 and 49.3                |

\*  $\delta_0$  – center shift,  $\Delta\epsilon$  – quadrupole splitting,  $\sigma_\Delta$  – sigma, H – hyperfine field, 2 separate sextet were used to fit the data in the reference, ND – not determined, NA – not applicable.

\*\* ferrihydrate reference prepared according to Raven et al., 1998.

TABLE S3. Primers used for DGGE, clone library construction, and quantitative PCR. PCRs with *Archaea* primers yielded no products in this study.

| Primer                  | Target group                             | Sequence (5'->3')                                              | Application           | Reference          |
|-------------------------|------------------------------------------|----------------------------------------------------------------|-----------------------|--------------------|
| Cya359F-GC              | most<br>Cyanobacteria                    | CGCCCGGGGCGCGCCCGGGCGGGGCGGGGGCACG<br>GGGGGGGGAATYTTCCGCAATGGG | DGGE                  | (9)                |
| CYA785R                 | most<br>Cyanobacteria                    | GACTACWGGGGTATCTAATCC                                          | DGGE                  | (4)                |
| GC-341-F (GM5-<br>F-GC) | most Bacteria                            | CGCCCGCCGCGCCCGCGCCCGTCCCGCCGCCCCGC<br>CCGCCTACGGGAGGCAGCAG    | DGGE                  | Modified after (7) |
| 907-R                   | most Bacteria                            | CCGTCAATTCCTTTRAGTTT                                           | DGGE                  | (6)                |
| GC-ARCH344f             | most Archaea                             | CGCCCGCCGCGCGCGGGCGGGGCGGGGGCACG<br>GGGGACGGGGYGCAGCAGGCGCGA   | DGGE                  | (3)                |
| ARCH519r                | most Archaea                             | GWATTACCGCGGCKGCTG                                             | DGGE                  | (1)                |
| GC-ARCH357f             | most Archaea                             | CGCCCGCCGCGCGCGGGCGGGGCGGGGGCACG<br>GGGGCCCTACGGGGCGCAGCAG     | DGGE                  | (12)               |
| ARCH693r                | most Archaea                             | GGATTACARGATTTTC                                               | DGGE                  | (12)               |
| GM3-8F                  | most Bacteria                            | AGAGTTTGATCMTGGCTCAG                                           | PCR; clone<br>library | (7)                |
| Uni1392R                | most Bacteria                            | ACGGGCGGTGTGTRC                                                | PCR; clone<br>library | (10)               |
| 341F                    | most Bacteria                            | CCTACGGGAGGCAGCAG                                              | qPCR                  | (7)                |
| 797R                    | most Bacteria                            | GGACTACCAGGGTATCTAATCCTGTT                                     | qPCR                  | (8)                |
| GAL214F                 | <i>mainly</i><br><i>Gallionella</i> spp. | CCTCTCGCTTTCGGAGTGCCG                                          | qPCR                  | (5)                |
| GAL384R                 | <i>mainly</i><br><i>Gallionella</i> spp. | GGTATGGCTGGATCAGGC                                             | qPCR                  | (2)                |

TABLE S4. Geochemical parameters of the spring, samples collected in August 2009. Concentrations for sodium, nitrate, nitrite and bromide were below the detection limit of ion chromatography.

| Distance from outlet [m] | °C          | O <sub>2</sub> [μM] | pH         | Fe(II) [μM] | Fe(III) [μM] | P <sub>total</sub> [μM] |
|--------------------------|-------------|---------------------|------------|-------------|--------------|-------------------------|
| 0 ± 0.05                 | 10.8 ± 0.1  | 15 ± 1              | 6.3 ± 0.05 | 15.9 ± 0.2  | 3.8 ± 0.2    | 0.09 ± 0.01             |
| 1.2 ± 0.05               | 12.5 ± 0.1  | 140 ± 7             | 6.5 ± 0.05 | 12.7 ± 0.9  | 6.6 ± 0.9    | 0.24 ± 0.02             |
| 2.2 ± 0.05               | 14.5 ± 0.01 | 217 ± 11            | 6.7 ± 0.05 | 12.6 ± 0.1  | 7.2 ± 0.1    | 0.21 ± 0.02             |

| Distance from outlet [m] | K <sup>+</sup> [mM] | Mg <sup>2+</sup> [mM] | Ca <sup>2+</sup> [mM] | F <sup>-</sup> [μM] | Cl <sup>-</sup> [mM] | SO <sub>4</sub> <sup>2-</sup> [mM] |
|--------------------------|---------------------|-----------------------|-----------------------|---------------------|----------------------|------------------------------------|
| 0 ± 0.05                 | 0.3 ± 0.03          | 2.2 ± 0.01            | 17.4 ± 0.6            | 32 ± 1              | 0.2 ± 0.003          | 0.5 ± 0.03                         |
| 1.2 ± 0.05               | 0.3 ± 0.01          | 2.2 ± 0.2             | 16.0 ± 0.7            | 28 ± 1              | 0.2 ± 0.01           | 0.8 ± 0.07                         |
| 2.2 ± 0.05               | 0.3 ± 0.01          | 2.2 ± 0.2             | 13.4 ± 0.8            | 19 ± 0.1            | 0.2 ± 0.01           | 0.8 ± 0.06                         |

| Distance from outlet [m] | CO <sub>3</sub> <sup>2-</sup> [mM] | alkalinity [mM] | delivery [L/min] |
|--------------------------|------------------------------------|-----------------|------------------|
| 0 ± 0.05                 | 44 ± 1                             | 51 ± 2          | 1.1 ± 0.05       |
| 1.2 ± 0.05               | 28 ± 1                             | 51 ± 2          |                  |
| 2.2 ± 0.05               | 20 ± 0.1                           | 48 ± 2          |                  |

TABLE S5. Phylogenetic affiliations and frequencies of bacterial 16S rRNA gene clones from the Fuschna spring. Samples were collected 1.2 m of the spring outlet in August 2009 from the middle of the flow channel and the flanking microbial mat, respectively. Each row represents a different operational taxonomic unit with a similarity cut-off of 97%. Taxonomic names in quotation marks are not yet validly published.

| Phylogenetic Affiliation  |                           |                            | Sampling Location |     | Representative Clones<br>from this Study | Closest Cultured Relative in<br>SILVA 108 NR Database | Sequence<br>Similarity [%] |
|---------------------------|---------------------------|----------------------------|-------------------|-----|------------------------------------------|-------------------------------------------------------|----------------------------|
|                           |                           |                            | Flow channel      | Mat |                                          |                                                       |                            |
| <i>Actinobacteria</i>     | <i>Actinomycetales</i>    | <i>Microbacteriaceae</i>   | 0                 | 1   | Fuschna-P4-H05                           | <i>Salinibacterium amurskyense</i> (AF539697)         | 96                         |
| <i>Bacteroidetes</i>      | <i>Bacteroidales</i>      | <i>Porphyromonadaceae</i>  | 0                 | 2   | Fuschna-P5-H01                           | <i>Paludibacter propionicigenes</i> (AB078842)        | 97                         |
|                           |                           | <i>Porphyromonadaceae</i>  | 0                 | 4   | Fuschna-P5-E06                           | <i>Paludibacter propionicigenes</i> (AB078842)        | 95                         |
|                           | <i>Flavobacteriales</i>   | <i>Cryomorphaceae</i>      | 2                 | 0   | Fuschna-P4-G09                           | <i>Owenweeksia hongkongensis</i> (AB125062)           | 88                         |
|                           |                           | <i>Flavobacteriaceae</i>   | 0                 | 1   | Fuschna-P3-G09                           | <i>Actibacter sediminis</i> (EF670651)                | 91                         |
|                           | <i>Sphingobacteriales</i> | <i>Chitinophagaceae</i>    | 0                 | 3   | Fuschna-P4-D06                           | <i>Ferruginibacter lapsinanis</i> (FJ177532)          | 94                         |
|                           |                           | <i>Chitinophagaceae</i>    | 2                 | 0   | Fuschna-P5-C08                           | <i>Sediminibacterium salmoneum</i> (EF407879)         | 97                         |
|                           |                           | <i>Sphingobacteriaceae</i> | 0                 | 1   | Fuschna-P4-H01                           | <i>Solitalea canadensis</i> (AB078046)                | 91                         |
|                           |                           | <i>Sphingobacteriaceae</i> | 0                 | 2   | Fuschna-P5-A04                           | <i>Pedobacter terricola</i> (EF446147)                | 93                         |
|                           |                           | NS11-12 marine group       | 0                 | 1   | Fuschna-P3-C07                           | <i>Solitalea koreensis</i> (EU787448)                 | 86                         |
| <i>Cyanobacteria</i>      | <i>Oscillatoriales</i>    |                            | 1                 | 6   | Fuschna-P5-F06                           | <i>"Tychonema bourrellyi"</i> (AB045897)              | 99                         |
| <i>Betaproteobacteria</i> | <i>Burkholderiales</i>    | <i>Comamonadaceae</i>      | 0                 | 1   | Fuschna-P4-C05                           | <i>"Leptothrix ginsengisoli"</i> (FM886840)           | 99                         |
|                           |                           | <i>Comamonadaceae</i>      | 4                 | 22  | Fuschna-P5-D04, P4-F04, P5-E01, P3-B07   | <i>Albidiferax ferrireducens</i> (AF435948))          | 97-98                      |
|                           |                           | <i>Comamonadaceae</i>      | 0                 | 2   | Fuschna-P5-G03                           | <i>Albidiferax ferrireducens</i> (AF435948)           | 98                         |
|                           |                           | <i>Comamonadaceae</i>      | 0                 | 1   | Fuschna-P4-A03                           | <i>Albidiferax ferrireducens</i> (AF435948)           | 98                         |



|                            |                           |                            |    |    |                                                                        |                                                         |    |
|----------------------------|---------------------------|----------------------------|----|----|------------------------------------------------------------------------|---------------------------------------------------------|----|
|                            | <i>Hydrogenophilales</i>  | <i>Hydrogenophilaceae</i>  | 0  | 1  | Fuschna-P4-H03                                                         | <i>Thiobacillus aquaesulis</i> (U58019)                 | 92 |
|                            | <i>Nitrosomonadales</i>   | <i>Gallionellaceae</i>     | 69 | 2  | Fuschna-P4-E07, P3-A09                                                 | <i>Gallionella ferruginea</i> (L07897)                  | 97 |
|                            | H2SRC138 cluster          |                            | 1  | 0  | Fuschna-P4-B09                                                         | n/a                                                     |    |
| <i>Deltaproteobacteria</i> | <i>Bdellovibrionales</i>  | <i>Bacteriovoraceae</i>    | 6  | 0  | Fuschna-P5-E09                                                         | <i>Bacteriovorax stolpii</i> (AJ288899)                 | 96 |
| <i>Gammaproteobacteria</i> | <i>Alteromonadales</i>    | <i>Shewanellaceae</i>      | 0  | 6  | Fuschna-P5-C01                                                         | <i>Shewanella putrefaciens</i> (X81623)                 | 99 |
|                            | <i>Aeromonadales</i>      | <i>Aeromonadaceae</i>      | 0  | 31 | Fuschna-P5-C02, P3-H07, P4-B04, P5-B06, P5-D02, P4-B02, P4-B06, P3-D09 | <i>Aeromonas punctata</i> subsp. <i>caviae</i> (X74674) | 99 |
|                            | <i>Enterobacteriales</i>  | <i>Enterobacteriaceae</i>  | 0  | 6  | Fuschna-P5-H02                                                         | <i>Buttiauxella noackiae</i> (AJ293689)                 | 99 |
|                            |                           |                            | 0  | 1  | Fuschna-P3-D08                                                         | <i>Plesiomonas shigelloides</i> (X60418)                | 93 |
|                            | <i>Legionellales</i>      | <i>Legionellaceae</i>      | 0  | 1  | Fuschna-P5-F02                                                         | <i>Legionella taurinensis</i> (DQ667196)                | 96 |
| <i>Verrucomicrobia</i>     | <i>Verrucomicrobiales</i> | <i>Verrucomicrobiaceae</i> | 0  | 1  | Fuschna-P5-F05                                                         | <i>Prostheco bacter fusiformis</i> (U60015)             | 88 |

### References supplementary material:

1. **Bano, N., S. Ruffin, B. Ransom, and J. T. Hollibaugh.** 2004. Phylogenetic Composition of Arctic Ocean Archaeal Assemblages and Comparison with Antarctic Assemblages. *Appl. Environ. Microbiol.* **70**:781-789.
2. **Heinzel, E., E. Janneck, F. Glombitza, M. Schlömann, and J. Seifert.** 2009. Population Dynamics of Iron-Oxidizing Communities in Pilot Plants for the Treatment of Acid Mine Waters. *Environ. Sci. Technol.* **43**:6138-6144.
3. **Lane, D. J.** 1991. 16S / 23S Sequencing, p. 115-175. *In* E. Stackebrandt and M. Goodfellow (ed.), *Nucleic Acid Techniques in Bacterial Systematics*. John Wiley and Sons, New York.
4. **Lee, S. H., C. Malone, and P. F. Kemp.** 1993. Use of multiple 16S rRNA-targeted fluorescent probes to increase signal strength and measure cellular RNA from natural planktonic bacteria. *Mar. Ecol. Prog. Ser.* **101**:193-201.
5. **Li, D., Z. Li, J. Yu, N. Cao, R. Liu, and M. Yang.** 2010. Characterization of Bacterial Community Structure in a Drinking Water Distribution System during an Occurrence of Red Water. *Appl. Environ. Microbiol.* **76**:7171-7180.

6. **Muyzer, G., E. C. de Waal, and A. G. Uitterlinden.** 1993. Profiling of Complex Microbial Populations by Denaturing Gradient Gel Electrophoresis Analysis of Polymerase Chain Reaction-Amplified Genes Coding for 16S rRNA. *Appl. Environ. Microbiol.* **59**:695-700.
7. **Muyzer, G., A. Teske, C. O. Wirsen, and H. W. Jannasch.** 1995. Phylogenetic relationships of *Thiomicrospira* species and their identification in deep-sea hydrothermal vent samples by denaturing gradient gel electrophoresis of 16S rDNA fragments. *Arch. Microbiol.* **164**:165-172.
8. **Nadkarni, M. A., F. E. Martin, N. A. Jacques, and N. Hunter.** 2002. Determination of bacterial load by real-time PCR using a broad-range (universal) probe and primers set. *Microbiol.* **148**:257-266.
9. **Nübel, U., F. Garcia-Pichel, and G. Muyzer.** 1997. PCR primers to amplify 16S rRNA genes from cyanobacteria. *Appl. Environ. Microbiol.* **63**:3327-3332.
10. **Pace, N. R., G. J. Olsen, and C. R. Woese.** 1986. Ribosomal RNA phylogeny and the primary lines of evolutionary descent. *Cell* **45**:325-326.
11. **Raven, K. P., A. Jain, and R. H. Loeppert.** 1998. Arsenite and arsenate adsorption on ferrihydrite: Kinetics, equilibrium, and adsorption envelopes. *Environmental Science & Technology* **32**:344-349.
12. **Yu, Z., R. Garcia-Gonzalez, F. L. Schanbacher, and M. Morrison.** 2008. Evaluations of Different Hypervariable Regions of Archaeal 16S rRNA Genes in Profiling of Methanogens by Archaea-Specific PCR and Denaturing Gradient Gel Electrophoresis. *Appl. Environ. Microbiol.* **74**:889-893.
